# Supplementary material
Source: PubMed Central journal article supplement (PMC4238003)

SUPPLEMENTARY DATA

**Supplementary Table 1.** Results of 2x2 ANOVA on Choroidal PO<sub>2</sub> (P<sub>C</sub>)

|                                         | <i>F-value</i> | <i>p-value</i> |
|-----------------------------------------|----------------|----------------|
| Time point                              | 0.083          | 0.777          |
| Treatment                               | 0.016          | 0.901          |
| Interaction of time point and treatment | 0.712          | 0.411          |

Degrees of freedom for the effect is 1, degrees of freedom for the error is 16.

**Supplementary Table 2.** Results of 2x2 ANOVA on photoreceptor oxygen consumption (Q<sub>av</sub>)

|                                         | <i>Dark</i> |         | <i>Light</i> |         |
|-----------------------------------------|-------------|---------|--------------|---------|
|                                         | F-value     | p-value | F-value      | p-value |
| Time point                              | 0.039       | 0.846   | 0.043        | 0.840   |
| Treatment                               | 0.019       | 0.893   | 0.181        | 0.678   |
| Interaction of time point and treatment | 0.490       | 0.494   | 0.153        | 0.703   |

Degrees of freedom for the effect is 1, degrees of freedom for the error is 16.

**Supplementary Table 3.** Results of 2x2 ANOVA on minimum PO<sub>2</sub> in the inner segments (P<sub>min</sub>).

|                                         | <i>Dark</i> |         | <i>Light</i> |         |
|-----------------------------------------|-------------|---------|--------------|---------|
|                                         | F-value     | p-value | F-value      | p-value |
| Time point                              | 0.184       | 0.674   | 0.089        | 0.770   |
| Treatment                               | 0.831       | 0.375   | 0.353        | 0.563   |
| Interaction of time point and treatment | 0.079       | 0.782   | 0.002        | 0.966   |

Degrees of freedom for the effect is 1, degrees of freedom for the error is 16.

**Supplementary Table 4.** Results of 2x2 ANOVA on average inner retinal PO<sub>2</sub> (P<sub>IR</sub>).

|                                         | <i>F-value</i> | <i>p-value</i> |
|-----------------------------------------|----------------|----------------|
| Time point                              | 0.025          | 0.876          |
| Treatment                               | 1.846          | 0.193          |
| Interaction of time point and treatment | 0.134          | 0.719          |

Degrees of freedom for the effect is 1, degrees of freedom for the error is 16.

**Supplementary Table 5.** Results of 2x2 ANOVA on average inner retinal PO<sub>2</sub> normalized to choroidal PO<sub>2</sub> (P<sub>IR</sub>/P<sub>C</sub>).

|                                         | <i>F-value</i> | <i>p-value</i> |
|-----------------------------------------|----------------|----------------|
| Time point                              | 1.683          | 0.213          |
| Treatment                               | 10.503         | <b>0.005</b>   |
| Interaction of time point and treatment | 11.298         | <b>0.004</b>   |

Degrees of freedom for the effect is 1, degrees of freedom for the error is 16. Testing the control mean against the diabetic mean at 12 weeks with a t-test revealed that the difference was significant with a power of greater than 85%.

SUPPLEMENTARY DATA

**Supplementary Figure 1.** Blood glucose measurements (A) and weight (B) for control and diabetic rats combined for 4 and 12 weeks. Mean  $\pm$  SD.

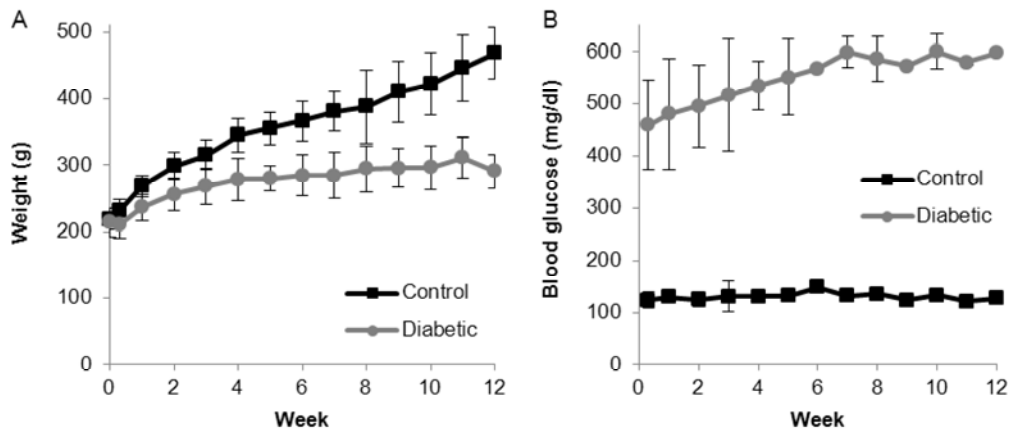

Supplement: supp_db14-0101_DB140101SupplementaryData.pdf [file supp_db14-0101_DB140101SupplementaryData.pdf]
